# Supplementary material
Source: Springer Nature journal article supplement (https://www.springermedizin.de/resource/supplementary/12943_2011_1009_MOESM7_ESM.pdf/9552100)
Supplement: MOESM7 [file 9552100]

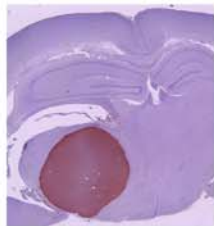

Parental U87MG  
1.25x

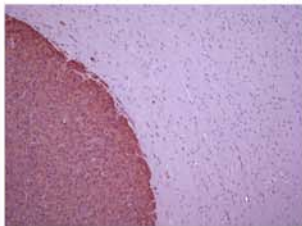

Parental U87MG  
10x

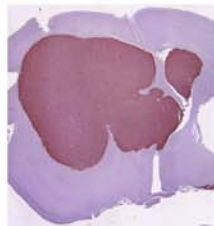

U87MG GFP Control  
Sorted Cells  
1.25x

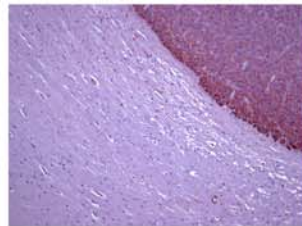

U87MG GFP Control  
Sorted Cells  
10x

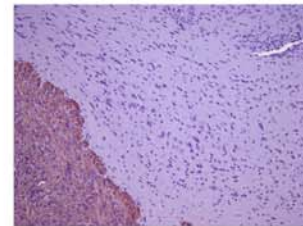

U87MG GFP Control  
Clone 19  
10x

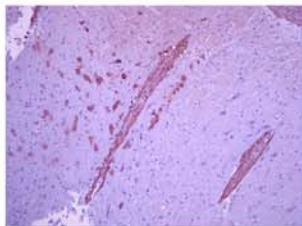

U87 MG Gal1  
Sorted Cells  
10x

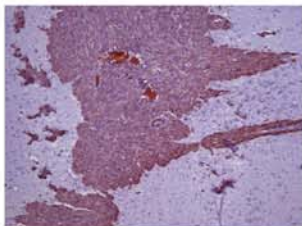

U87MG Cal1  
Clone 2  
10x

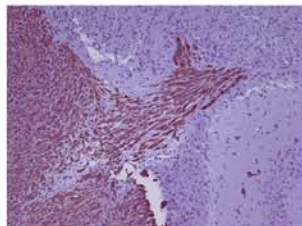

U87MG Gal1  
Clone 3  
10x

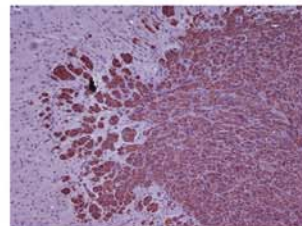

U87MG Gal1  
Clone 5  
10x

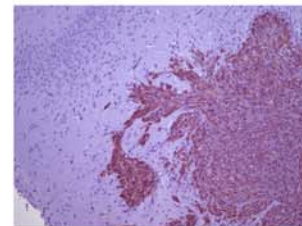

U87MG Gal1  
Clone 6  
10x

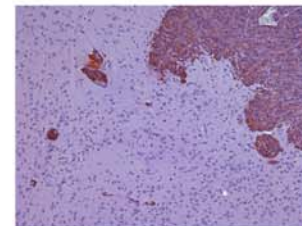

U87MG Gal1  
Clone 8  
10x
